# Supplementary material for: Advanced Lung Cancer Inflammation Index as a Prognostic Inflammation–Nutrition Marker in Appendiceal High-Grade Pseudomyxoma Peritonei: A 10-Year Single-Center Study
Source: Research Square preprint supplement (doi:10.21203/rs.3.rs-8533286/v1), 2026-02-10
Supplement: Supplementary file 1 [file ed9737a4b5788115c706b7b5.docx]

**Appendix**

**Table S1. Definitions and formulas of the integrated inflammation**

| **Index** | **Formula / Definition** |
| --- | --- |
| **PNI** | serum albumin (ALB, g/L) + 5 × absolute lymphocyte count (×10⁹/L) |
| **NLR** | absolute neutrophil count (×10⁹/L) / absolute lymphocyte count (×10⁹/L) |
| **ALI** | BMI (kg/m²) × ALB (g/L) / NLR |
| **PLR** | platelet count (×10⁹/L) / absolute lymphocyte count (×10⁹/L) |
| **SII** | platelet count (×10⁹/L) × NLR |
| **LMR** | bsolute lymphocyte count (×10⁹/L) / absolute monocyte count (×10⁹/L) |
| **SIS** | SIS was derived from LMR and ALB using predefined cutoffs: SIS = 0 if both ALB and LMR were above the cutoffs; SIS = 1 if either ALB or LMR was above the cutoffs; SIS = 2 if both were below the cutoffs |

**Table S2. Determination of clinical cutoffs**

| **Variable** | **Cut-off** | **Method** |
| --- | --- | --- |
| **Age (years)** | 60 | Older adults in China: ≥60 years |
| **Body mass index (kg/m²)** | 18.5 | Normal range: 18.5–23.9 kg/m²; cutoff at 18.5 kg/m² |
| **Albumin (g/L)** | 40 | Serum albumin reference interval: 40–55 g/L; cutoff at 40 g/L |
| **PNI** | 45.800 | Cutoffs by ROC with maximum Youden index |
| **LMR** | 2.948 | Cutoffs by ROC with maximum Youden index |
| **PLR** | 283.621 | Cutoffs by ROC with maximum Youden index |
| **NLR** | 3.573 | Cutoffs by ROC with maximum Youden index |
| **SII** | 870.527 | Cutoffs by ROC with maximum Youden index |
| **ALI** | 341.031 | Cutoffs by ROC with maximum Youden index |
| **CEA** | 7.360 | Cutoffs by ROC with maximum Youden index |
| **CA125** | 72.055 | Cutoffs by ROC with maximum Youden index |
| **CA19-9** | 466.070 | Cutoffs by ROC with maximum Youden index |
| **Ki67** | 12.500 | Cutoffs by ROC with maximum Youden index |
| **PCI** | 15.000 | Cutoffs by ROC with maximum Youden index |

## (Variables dichotomized at their respective cutoffs were coded as 1 if ≥ the cutoff and 0 if < the cutoff)

**Table S3. Detailed baseline characteristics and comparison of inflammation-nutrition indices**

| **Variable** | **Overall Population** | **Mortality** | **Survival** | **P-value** |
| --- | --- | --- | --- | --- |
| gender: female | 146 (65.5%) | 99 (65.1%) | 47 (66.2%) | 0.996 |
| gender: male | 77 (34.5%) | 53 (34.9%) | 24 (33.8%) |  |
| hypertension: without | 170 (76.2%) | 113 (74.3%) | 57 (80.3%) | 0.423 |
| hypertension: with | 53 (23.8%) | 39 (25.7%) | 14 (19.7%) |  |
| diabetes: without | 202 (90.6%) | 135 (88.8%) | 67 (94.4%) | 0.282 |
| diabetes: with | 21 (9.4%) | 17 (11.2%) | 4 (5.6%) |  |
| intra_perfusion_status: none | 25 (11.2%) | 20 (13.2%) | 5 (7.0%) | 0.262 |
| intra_perfusion_status: done | 198 (88.8%) | 132 (86.8%) | 66 (93.0%) |  |
| Pathological _grade: High-grade | 165 (74.0%) | 102 (67.1%) | 63 (88.7%) | 0.001 |
| Pathological _grade: High-grade with signet-ring cells | 58 (26.0%) | 50 (32.9%) | 8 (11.3%) |  |
| age_group: low | 115 (51.6%) | 78 (51.3%) | 37 (52.1%) | 1.000 |
| age_group: high | 108 (48.4%) | 74 (48.7%) | 34 (47.9%) |  |
| BMI_group: low | 8 (3.6%) | 7 (4.6%) | 1 (1.4%) | 0.441 |
| BMI_group: high | 215 (96.4%) | 145 (95.4%) | 70 (98.6%) |  |
| ALB_group: low | 179 (80.3%) | 130 (85.5%) | 49 (69.0%) | 0.007 |
| ALB_group: high | 44 (19.7%) | 22 (14.5%) | 22 (31.0%) |  |
| PNI_group: low | 164 (73.5%) | 122 (80.3%) | 42 (59.2%) | 0.002 |
| PNI_group: high | 59 (26.5%) | 30 (19.7%) | 29 (40.8%) |  |
| NLR_group: low | 143 (64.1%) | 91 (59.9%) | 52 (73.2%) | 0.074 |
| NLR_group: high | 80 (35.9%) | 61 (40.1%) | 19 (26.8%) |  |
| PLR_group: low | 163 (73.1%) | 106 (69.7%) | 57 (80.3%) | 0.136 |
| PLR_group: high | 60 (26.9%) | 46 (30.3%) | 14 (19.7%) |  |
| LMR_group: low | 95 (42.6%) | 73 (48.0%) | 22 (31.0%) | 0.024 |
| LMR_group: high | 128 (57.4%) | 79 (52.0%) | 49 (69.0%) |  |
| ALI_group: low | 137 (61.4%) | 102 (67.1%) | 35 (49.3%) | 0.016 |
| ALI_group: high | 86 (38.6%) | 50 (32.9%) | 36 (50.7%) |  |
| SII_group: low | 119 (53.4%) | 74 (48.7%) | 45 (63.4%) | 0.057 |
| SII_group: high | 104 (46.6%) | 78 (51.3%) | 26 (36.6%) |  |
| SIS: 0 | 36 (16.1%) | 15 (9.9%) | 21 (29.6%) | <0.001 |
| SIS: 1 | 100 (44.8%) | 71 (46.7%) | 29 (40.8%) |  |
| SIS: 2 | 87 (39.0%) | 66 (43.4%) | 21 (29.6%) |  |
| CEA_group:low | 78 (35.0%) | 37 (24.3%) | 41 (57.7%) | <0.001 |
| CEA_group: high | 145 (65.0%) | 115 (75.7%) | 30 (42.3%) |  |
| CA125_group: low | 113 (50.7%) | 62 (40.8%) | 51 (71.8%) | <0.001 |
| CA125_group: high | 110 (49.3%) | 90 (59.2%) | 20 (28.2%) |  |
| CA19-9_group: low | 179 (80.3%) | 111 (73.0%) | 68 (95.8%) | <0.001 |
| CA19-9_group: high | 44 (19.7%) | 41 (27.0%) | 3 (4.2%) |  |
| Ki67_group:low | 48 (21.5%) | 21 (13.8%) | 27 (38.0%) | <0.001 |
| Ki67_group: high | 175 (78.5%) | 131 (86.2%) | 44 (62.0%) |  |
| CCR_Postoperative_group: low | 37 (16.6%) | 14 (9.2%) | 23 (32.4%) | <0.001 |
| CCR_Postoperative_group: high | 186 (83.4%) | 138 (90.8%) | 48 (67.6%) |  |
| prePSS_group: low | 138 (61.9%) | 89 (58.6%) | 49 (69.0%) | 0.177 |
| prePSS_group: high | 85 (38.1%) | 63 (41.4%) | 22 (31.0%) |  |
| PCI_Intraoperative_group: low | 34 (15.2%) | 13 (8.6%) | 21 (29.6%) | <0.001 |
| PCI_Intraoperative_group: high | 189 (84.8%) | 139 (91.4%) | 50 (70.4%) |  |
| survival_months | 21.00 (12.00，39.00) | 15.00 (8.00，31.00) | 33.00 (21.00，56.50) | <0.001 |
| hospitaldays | 24.00 (21.00，28.50) | 26.00 (22.00，31.00) | 21.00 (18.50，23.50) | <0.001 |
| months_for_surgery | 9.00 (4.00，20.00) | 10.00 (5.00，21.25) | 8.00 (4.00，17.00) | 0.413 |
| LY | 1.25 (0.99，1.56) | 1.23 (0.93，1.54) | 1.28 (1.04，1.67) | 0.254 |
| MO | 0.39 (0.30，0.49) | 0.39 (0.30，0.51) | 0.38 (0.28，0.45) | 0.153 |
| NE | 3.79 (3.08，4.97) | 3.84 (3.11，5.27) | 3.71 (3.05，4.73) | 0.402 |
| PLT | 256.00 (216.00，335.00) | 266.50 (222.50，338.00) | 245.00 (205.50，325.00) | 0.203 |
| BUN | 4.50 (3.70，5.55) | 4.60 (3.77，5.80) | 4.40 (3.70，5.35) | 0.311 |
| Cr | 61.40 (53.45，71.50) | 61.40 (53.12，72.97) | 61.20 (55.70，69.00) | 0.888 |
| ALT | 11.90 (8.50，17.90) | 11.35 (8.47，16.50) | 13.50 (8.70，23.35) | 0.065 |
| AST | 17.40 (14.65，22.60) | 17.45 (14.80，22.60) | 17.20 (14.40，22.55) | 0.919 |
| TBIL | 10.20 (8.10，13.10) | 10.20 (8.10，12.43) | 10.30 (8.05，14.85) | 0.440 |
| DBIL | 1.90 (1.50，2.70) | 2.00 (1.50，2.62) | 1.90 (1.50，3.00) | 0.835 |

**Table S4. Univariable Cox regression results**

| **Variable** | **Level** | **HR (95% CI)** | **P-value** |
| --- | --- | --- | --- |
| Gender | Low | 1.00 (1.00–1.00) |  |
| Gender | High | 1.28 (0.91–1.78) | 0.152 |
| Hypertension | Without | 1.00 (1.00–1.00) |  |
| Hypertension | With | 1.29 (0.90–1.86) | 0.170 |
| diabetes | Without | 1.00 (1.00–1.00) |  |
| diabetes | With | 1.35 (0.81–2.24) | 0.245 |
| intra_perfusion_status | None | 1.00 (1.00–1.00) |  |
| intra_perfusion_status | Done | 0.43 (0.27–0.69) | <0.001 |
| Pathological_grade | High-grade | 1.00 (1.00–1.00) |  |
| Pathological_grade | High-grade with signet-ring cells | 2.16 (1.53–3.05) | <0.001 |
| age_group | Low | 1.00 (1.00–1.00) |  |
| age_group | High | 1.01 (0.73–1.40) | 0.937 |
| BMI_group | Low | 1.00 (1.00–1.00) |  |
| BMI_group | High | 0.57 (0.27–1.22) | 0.145 |
| ALB_group | Low | 1.00 (1.00–1.00) |  |
| ALB_group | High | 0.56 (0.36–0.88) | 0.012 |
| PNI_group | Low | 1.00 (1.00–1.00) |  |
| PNI_group | High | 0.54 (0.36–0.80) | 0.002 |
| NLR_group | Low | 1.00 (1.00–1.00) |  |
| NLR_group | High | 1.41 (1.02–1.96) | 0.037 |
| PLR_group | Low | 1.00 (1.00–1.00) |  |
| PLR_group | High | 1.41 (0.99–2.00) | 0.054 |
| LMR_group | low | 1.00 (1.00–1.00) |  |
| LMR_group | High | 0.67 (0.49–0.92) | 0.013 |
| ALI_group | low | 1.00 (1.00–1.00) |  |
| ALI_group | High | 0.66 (0.47–0.92) | 0.016 |
| SII_group | low | 1.00 (1.00–1.00) |  |
| SII_group | High | 1.42 (1.03–1.95) | 0.032 |
| SIS | 0 | 1.00 (1.00–1.00) |  |
| SIS | 1 | 1.81 (1.03–3.16) | 0.038 |
| SIS | 2 | 2.43 (1.39–4.27) | 0.002 |
| CEA_group | low | 1.00 (1.00–1.00) |  |
| CEA_group | High | 1.80 (1.24–2.61) | 0.002 |
| CA125_group | low | 1.00 (1.00–1.00) |  |
| CA125_group | High | 2.16 (1.56–2.99) | <0.001 |
| CA19-9_group | low | 1.00 (1.00–1.00) |  |
| CA19-9_group | High | 2.94 (2.04–4.23) | <0.001 |
| Ki67_group | low | 1.00 (1.00–1.00) |  |
| Ki67_group | High | 2.11 (1.33–3.34) | 0.002 |
| CCR_Postoperative_group | low | 1.00 (1.00–1.00) |  |
| CCR_Postoperative_group | High | 3.40 (1.96–5.90) | <0.001 |
| prePSS_group | low | 1.00 (1.00–1.00) |  |
| prePSS_group | High | 1.07 (0.77–1.47) | 0.696 |
| PCI_Intraoperative_group | low | 1.00 (1.00–1.00) |  |
| PCI_Intraoperative_group | High | 2.95 (1.67–5.22) | <0.001 |
| hospitaldays | - | 1.03 (1.02–1.04) | <0.001 |
| months_for_surgery | - | 1.00 (0.99–1.00) | 0.390 |
| LY | - | 0.75 (0.52–1.09) | 0.128 |
| MO | - | 2.23 (0.89–5.59) | 0.088 |
| NE | - | 1.02 (0.95–1.10) | 0.556 |
| PLT | - | 1.00 (1.00–1.00) | 0.432 |
| BUN | - | 1.15 (1.04–1.27) | 0.006 |
| Cr | - | 1.01 (1.00–1.02) | 0.030 |
| ALT | - | 0.99 (0.98–1.01) | 0.211 |
| AST | - | 1.00 (0.99–1.01) | 0.957 |
| TBIL | - | 1.00 (0.97–1.02) | 0.832 |
| DBIL | - | 1.02 (1.00–1.05) | 0.095 |
